# Supplementary material for: Gold-black micropillar electrodes for microfluidic ELISA of bone metabolic markers
Source: Royal Society of Chemistry journal article supplement (doi:10.1039/c0an00619j), 2010-11-18
Supplement: c0an00619j.pdf [file c0an00619j.pdf]

1 *Fabrication of the microdevice*

2 The microdevice shown in Fig. 1 comprises of a glass substrate patterned with  
3 electrodes and a PDMS microchannel. The electrodes were fabricated using the  
4 conventional photolithography techniques including sputter-deposition of metals,  
5 photoresist patterning, chemical etching, and lift-off. A gold layer (230 nm) was first  
6 deposited on a glass wafer with a chromium intermediate layer (60 nm) and patterned  
7 for the working and auxiliary electrodes. The active area of the working electrode was  
8  $500\ \mu\text{m} \times 500\ \mu\text{m}$ . The reference electrode was formed with a silver layer (650 nm).  
9 A polyimide layer (3.0  $\mu\text{m}$ , Toray Industries, Japan) was formed to delineate the active  
10 areas for the electrodes and the pad areas. The silver layer was also covered with the  
11 polyimide layer, except for two pinholes of 70  $\mu\text{m}$  diameter, which were used to make  
12 the reference electrode durable in a concentrated KCl solution. Subsequently, an array  
13 of micropillars (30  $\mu\text{m}$  in diameter) was fabricated on the active area of the gold  
14 working electrode with a thick film photoresist SU-8 (Microchem, US). A gold layer  
15 (230 nm) was again sputter-deposited on the working electrode with the micropillars  
16 through a stainless steel mask with a square hole of  $500\ \mu\text{m} \times 500\ \mu\text{m}$ . The wafer was  
17 then cut into small pieces (20 mm  $\times$  15 mm). The surface of the micropillars was  
18 modified with gold black at a current density of  $-60\ \mu\text{A}/\text{mm}^2$  for 5 min in a vigorously

1 stirred solution containing 83 mM hydrogen tetrachloroaurate(III) tetrahydrate and 1.58  
2 mM lead(II) acetate (Wako Pure Chemicals Industries, Japan). Prior to experiments, a  
3 silver chloride layer was grown from the pinholes by applying 50 nA for 5 min in a 0.1  
4 M KCl solution with respect to a platinum plate electrode.

5 The PDMS microstructure was fabricated using micromolding. The master for  
6 preparing the PDMS microstructure was fabricated with SU-8 photoresist using a  
7 photomask having the desired shape. The liquid PDMS prepolymers composed of a  
8 mixture of 10:1 silicon elastomer and the curing agent (Shin-Etsu Chemical, Japan)  
9 were casted onto the SU-8 master. The mixture was cured at 80°C for 1 h, and the  
10 PDMS replica was then peeled off from the mold. The serpentine channel was 55  $\mu\text{m}$   
11 in height, 500  $\mu\text{m}$  in width, and 50 mm in length. The PDMS micropillars were 55  $\mu\text{m}$   
12 in height and 50  $\mu\text{m}$  in diameter. The inter-pillar distance (edge to edge) was 50  $\mu\text{m}$ ,  
13 and the number of PDMS micropillars was approximately 6000. Finally, the PDMS  
14 substrate was aligned and placed on the substrate with the electrodes under a  
15 microscope, and was reversibly sealed by applying slight pressure between the two  
16 substrates.

17

18 *Measurement procedures*

1 Fig. 2: The 3D micropillar electrode modified with gold black and having no  
2 microchannel was used to perform ELISA of bone alkaline phosphatase (BAP). A  
3 drop of 20  $\mu\text{g}/\text{ml}$  primary monoclonal antibody against human BAP (Abcam, UK) was  
4 placed on four different working electrodes: two 3D electrodes with and without gold  
5 black, and two 2D electrodes with and without gold black. The antibody was then  
6 physically adsorbed for 10 min. After blocking with lactoprotein, a drop of 10 U/L  
7 BAP (Abcam, UK) was placed on the electrodes and incubated for 10 min. After  
8 washing with PBS, 20  $\mu\text{g}/\text{ml}$  secondary biotinylated antibody against human BAP  
9 (Abcam, UK) and 0.5 U/ml  $\beta$ -galactosidase-streptavidin complex (Vector Laboratories,  
10 Switzerland) were subsequently placed on the electrodes and incubated for 10 and 15  
11 min, respectively. Finally, a drop of 4.5  $\mu\text{M}$  *p*-aminophenyl- $\beta$ -D-galactopyranoside  
12 (PAPG, Sigma-Aldrich, USA) was placed on the electrodes.  $\beta$ -galactosidase converts  
13 PAPG to *p*-aminophenol (PAP). After 10-min incubation, cyclic voltammograms were  
14 recorded at a scanning rate of 20 mV/s from +0.8 to -0.4 V vs. the Ag/AgCl reference  
15 electrode by using an Autolab PGSTAT12 potentiostat (Eco Chemie, Netherlands).

16 Fig. 3(a): To directly immobilize  $\beta$ -galactosidase onto the PDMS micropillars, the  
17 PDMS substrate was first immersed in acetone for 5 min, washed with distilled water,  
18 and immersed in 30%(v/v) hydrogen peroxide for 1 h. The surface was then reacted

1 with 2.0%(v/v) 3-aminopropyl-triethoxysilane for 2 h at room temperature and  
2 subsequently for 5 min at 50°C. After washing with acetone, the PDMS substrate was  
3 placed on a plain glass substrate to form a microchannel. The amino group on the  
4 PDMS surface was activated by passing 5.0%(v/v) glutaraldehyde at a flow rate of 1  
5  $\mu\text{l}/\text{min}$  for 1 h. During this step, the color of PDMS changed to light orange. After  
6 washing with distilled water, 0.5 U/ml  $\beta$ -galactosidase solution was introduced into the  
7 microchannel at a flow rate of 1  $\mu\text{l}/\text{min}$  for 15 min. Following this, PAPG with six  
8 different concentrations was introduced into the microchannel at 1  $\mu\text{l}/\text{min}$  and  
9 enzymatically converted PAP was oxidized downstream at the planar working electrode.  
10 The potential of the working electrode was set to +0.3 V (vs. Ag/AgCl), and the steady  
11 oxidation current was recorded using the potentiostat.

12 Fig. 3(b): The reactions required for ELISA were performed upstream on the surface  
13 of PDMS micropillars in a serpentine channel and the enzymatically converted analytes  
14 were detected downstream with the 3D working electrode. First, antibody against  
15 tartrate-resistant acid phosphatase-5b (TRACP-5b) was immobilized on the PDMS  
16 micropillars by using a covalent binding method. Briefly, the PDMS substrate with the  
17 micropillars in the serpentine channel was placed on a bare glass slide. After  
18 activating the surface of the PDMS micropillars as described above, 20  $\mu\text{g}/\text{ml}$  primary

1 antibody against human TRACP-5b (Santa Cruz Biotechnology, US) was introduced  
2 into the microchannel at a flow rate of 1  $\mu\text{l}/\text{min}$  for 10 min. The entire surface of the  
3 microchannel was then blocked with lactoprotein, and TRACP-5b with five different  
4 concentrations was introduced into the microchannel at 1  $\mu\text{l}/\text{min}$  and allowed to react  
5 with the immobilized TRACP for 10 min. After washing with PBS, 20  $\mu\text{g}/\text{ml}$   
6 secondary biotinylated antibody against human TRACP-5b (Santa Cruz Biotechnology,  
7 US) was introduced into the microchannel for 10 min. Then, 0.5 U/ml  
8  $\beta$ -galactosidase-streptavidin complex was introduced at a flow rate of 1  $\mu\text{l}/\text{min}$  and  
9 allowed to react with the secondary antibody labeled with biotin for 15 min. The  
10 PDMS substrate was subsequently peeled off from the glass slide and placed on the  
11 substrate with the 3D working electrode. Finally, 4.5  $\mu\text{M}$  PAPG was introduced into  
12 the microchannel at 1  $\mu\text{l}/\text{min}$  and the detection current was measured. The potential  
13 was kept at +0.3 V with respect to the Ag/AgCl reference electrode, and the output  
14 current caused by oxidation of PAP to *p*-quinoneimine on the electrode was measured  
15 with a potentiostat.
